# Supplementary material for: A Data Privacy Protection Method for Infectious Disease Prediction Models with Balanced Training Speed and Accuracy
Source: Research Square preprint supplement (doi:10.21203/rs.3.rs-7728227/v1), 2025-12-03
Supplement: Supplementary file 1 [file 421bfb3841d3d0d44309cb57.docx]

**Supplementary Figures**

**Figure S1.** Related Features

**Supplementary Tables**

**Table S1.1.** The T-test for comparing the training speeds between Federal learning, Hybrid Homomorphic and Randomized Transmission Hybrid Homomorphic Algorithm.

**Table S1.2.** The T-test for comparing the training speeds between SGD, SSGD, DSSGD and DS-DSSGD algorithms.

**Table S1.3.** The T-test for comparing the training accuracy between SGD, SSGD, DSSGD and DS-DSSGD algorithms.

**Supplementary Methods**

**Method S1.** LSTM Model Based on Federated Learning

**Method S2.** Federated Learning based Random Transmission Hybrid Homomorphic Algorithm.

**Supplementary Figures**


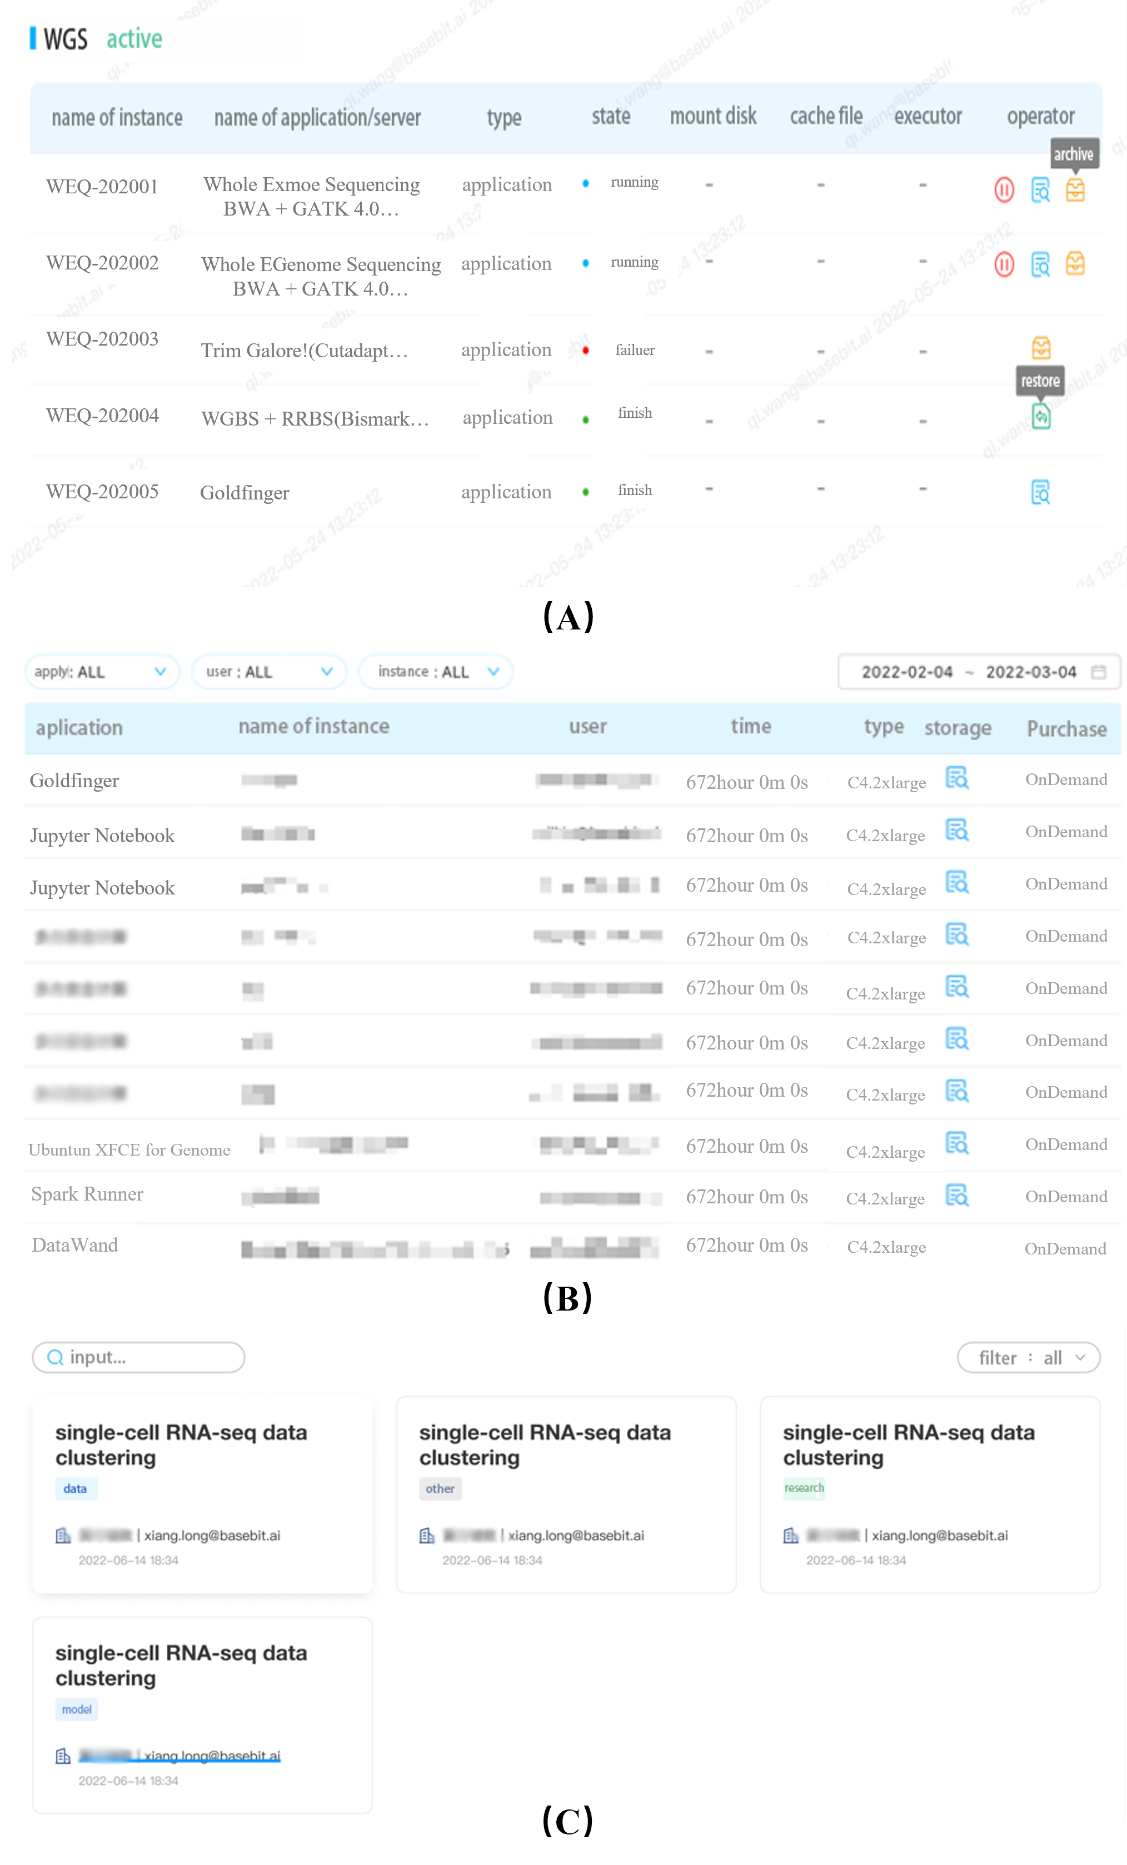


**Figure S1.** Related Features (A)Management of Work Instances(B)Usage Report(C)Requirements Hub

**Supplementary Tables**

**Table S1.1.** The T-test for comparing the training speeds between Federal learning, Hybrid Homomorphic and Randomized Transmission Hybrid Homomorphic Algorithm.

| Method name | Mean(min) | Std(min) |  |
| --- | --- | --- | --- |
| Federal learning | 51.698601 | 0.814338 | 0.000294 |
| RTHHFL | 40.375054 | 1.028403 |
| Hybrid Homomorphic | 46.125207 | 0.682481 | 0.000358 |
| RTHHFL | 40.375054 | 1.028403 |

**Table S1.2.** The T-test for comparing the training speeds between SGD, SSGD, DSSGD and DS-DSSGD algorithms.

| Method name | Mean(min) | Std(min) |  |
| --- | --- | --- | --- |
| SGD | 236.289437 | 3.297586 | 0.000024 |
| DS-DSSGD | 218.636846 | 4.870101 |
| SSGD | 237.516044 | 6.895817 | 0.000270 |
| DS-DSSGD | 218.636846 | 4.870101 |
| DSSGD | 265.966658 | 8.479438 | 0.000002 |
| DS-DSSGD | 218.636846 | 4.870101 |

**Table S1.3.** The T-test for comparing the training accuracy between SGD, SSGD, DSSGD and DS-DSSGD algorithms.

| Method name | Mean | Std |  |
| --- | --- | --- | --- |
| SGD | 1.061372 | 0.015092 | 0.362185 |
| DS-DSSGD | 1.082679 | 0.016439 |
| SSGD | 1.110260 | 0.013769 | 0.227343 |
| DS-DSSGD | 1.082679 | 0.016439 |
| DSSGD | 1.067448 | 0.055788 | 0.599511 |
| DS-DSSGD | 1.082679 | 0.016439 |

**Supplementary Methods**

**Method S1**

LSTM Model Based on Federated Learning. The basic principle of federated learning is that each participant maintains data locally and updates model parameters through model aggregation. Thus, it can protect data privacy while improving the predictive performance of the model,the steps of which are as follows.

**Step 1: Training Initialization.** Each training participant, i.e., client, under the coordination of a central server, negotiates initial training weights suitable for all parties. One of the clients generates the private key () and public key () for the CKKS homomorphic encryption algorithm and shares the public key with all clients.

**Step 2: Participants train the LSTM model (Eq. 1.1-Eq. 1.4).**

The input X is a matrix in the form of, where is the number of input parameters. is an n*4 weight matrix, with , and is the number of hidden nodes. represents the output of each hidden node at the previous time step, which is a matrix in the form of , and the number of its elements depends on the number of hidden nodes . is an m*4 weight matrix. represents the output of the input layer.

is a weight matrix in the form of , which contains the weights for four gates: (input gate), (forget gate), (output gate), and (memory gate). represents the sigmoid function.

⨀ represents the vector dot product operation. is the gradient information generated during the training process.

**Step 3: Carrying out training and perform backpropagation.**

Each client uses the gradient information () to have the output (Eq. 1.5).

is the weight matrix for the output of each hidden layer node in the form of , where represents the number of hidden layer nodes.

After that, backpropagation is performed (Eq. 1.6-1.21). The update process for the backpropagation parameters is as follows:

represents the learning rate, and represents the error between the true value and the predictive value.

For each hidden unit:

∆IFOG represents the sum of the biases for the four gates (Input, Forget, Output, and Gate), which are initialized to 0.

represents the memory value of the current hidden node, represents the memory value of the previous hidden node, where , and is the number of hidden nodes. ) represents the weight matrix for the four gates of the current hidden node, where is the weight matrix for the input gate, is the weight matrix for the forget gate, is the weight matrix for the output gate, and is the weight matrix for the memory gate.

When iterating the hidden node for all U, we have:

represents the output of the previous hidden layer.

（）is an m*4 matrix, where each element represents the weight of the link from that node to other hidden nodes. During the backward update process, each node is traversed and the weights of all other hidden nodes to the given node are updated. Therefore, each iteration will modify all weights in the row of all matrices.

Therefore, when traversing to a node , weight updates are carried out on , indicating that the weights of all other hidden nodes to this node will be updated accordingly.

The same principle applies to the matrices:

**Step 4: Employing the symmetric private key encryption technique in CKKS homomorphic encryption to encrypt the trained gradient information by private key (Eq. 1.22-1.23).**

and represent the encrypted gradient information, where is composed of , and is composed of . CKKS_EN refers to the symmetric encryption algorithm in Microsoft's SEAL library [1] used for this encryption process.

**Step 5: The server collects the encrypted gradient information, computes it, and distributes the results back to the individual clients (Eq. 1.24-1.25).** The clients then use the new weight information to continue training, repeating steps 2 through 5 until the model converges.

andare weight matrices that determine the weights assigned to the gradient information from each client, and they are determined by the importance of the participating parties’ information. and represent the newly calculated weight information after aggregating the weighted information from all clients.

**Method S2**

### **Federated Learning based Random Transmission Hybrid Homomorphic Algorithm.**In addressing the issue of data privacy protection for the federated learning, we usually employ homomorphic encryption technology[2] to encrypt data. While it can effectively safeguard data security, the encryption process inevitably leads to a significant increase in data size, subsequently exacerbating the time cost of data transmission over the network. The classical federated learning mechanism involves a full cycle of encrypted data transmission, followed by gradient information sharing and model updating at each round of communication. Since it significantly slows down the overall model training rate, we developed a Federated Learning based Random Transmission Hybrid Homomorphic Algorithm, the steps of which are as follows.

**Step 1:** We incorporate the semi-homomorphic Paillier algorithm [3] into Equations 1.22-1.23. Specifically, the input gate matrix, forget gate matrix, and output gate matrix, which are prone to information leakage, are encrypted using the fully homomorphic CKKS encryption algorithm[4]. In contrast, the forget gate matrix, which is less likely to reveal sensitive information, is encrypted using the semi-homomorphic Paillier encryption algorithm.

Therefore, firstly, in Step 1 of Supplementary Method S1, not only do we need to generate a pair of private key () and public key () for CKKS, but we also need to generate a pair of private key () and public key () for semi-homomorphic Paillier algorithm, and share both public keys with each client.

Consequently, Equations 1.22-1.23 in Step 4 of Supplementary Method S1 are modified as follows:

"" represents the encryption algorithm of semi-homomorphic Paillier.

Similarly, Equations 1.24 and 1.25 in Step 5 of Supplementary Method S1 are modified as follows:

and represent the new weight information obtained after aggregating the weight information from all clients. CKKS_DE denotes the CKKS decryption algorithm, and Paillier_DE represents the Paillier decryption algorithm[3]. is a matrix that determines the weights of the gradient information from each client.

**Step 2:** During the training initialization phase in Supplementary Method S1, each client receives the same transmission sequence, sequence_01, generated by a designated client. sequence_01 is a string composed of the digits 0 and 1, with the total number of digits determined by the number of training rounds (the maximum value required for one training session by each client). The distribution of these digits is agreed upon by all clients. Therefore, in Step 4 of Supplementary Method S1, whether to send data should first be determined based on sequence_01.

References

1. Bellare, M., et al., A Concrete Security Treatment of Symmetric Encryption. 1997. 394-403.

2. Cheon, J.H., S. Hong, and D. Kim, Remark on the Security of CKKS Scheme in Practice. IACR Cryptol. ePrint Arch., 2020. 2020: p. 1581.

3. Paillier, P., Public-Key Cryptosystems Based on Composite Degree Residuosity Classes. Vol. 5. 1999. 223-238.

4. Cheon, J.H., et al. Homomorphic Encryption for Arithmetic of Approximate Numbers. in Advances in Cryptology – ASIACRYPT 2017. 2017. Cham: Springer International Publishing.
